# Supplementary material for: Clinician Burnout and Effectiveness of Guideline-Recommended Psychotherapies
Source: PubMed Central journal article supplement (PMC11024738; doi:10.1001/jamanetworkopen.2024.6858), 2024-04-17
Supplement: jamanetwopen-e246858-s002.pdf [file jamanetwopen-e246858-s002.pdf]

## Data Sharing Statement

Sayer. Clinician Burnout and Effectiveness of Guideline-Recommended Psychotherapies. *JAMA Netw Open*. Published April 17, 2024. doi:10.1001/jamanetworkopen.2024.6858

### Data

**Data available:** Yes

**Data types:** Deidentified participant data

**How to access data:** A de-identified data set is available upon reasonable request from the first author at [nina.sayer@va.gov](mailto:nina.sayer@va.gov)

**When available:** beginning date: 08-01-2024

### Supporting Documents

**Document types:** None

### Additional Information

**Who can access the data:** researchers whose proposed use of the data has been approved

**Types of analyses:** for a specified purpose

**Mechanisms of data availability:** after approval of a proposal and with a signed use agreement

**Any additional restrictions:** VA Privacy Officer will need to review and approve use of these data for individuals outside of VHA and means of data sharing
